# Supplementary material for: Serum Metabolomic Alteration in Rats with Osteoarthritis Treated with Palm Tocotrienol-Rich Fraction Alone or in Combination with Glucosamine Sulphate
Source: MDPI journal article supplement (doi:10.3390/life13122343), 2023-12-15
Supplement: s1 [file s1]

**Table S1:** List of biochemical pathways (MetaboAnalyst) identified for **OC vs SC**

| <b>Pathway</b>                                      | <b>Match status</b> | <b>p-value</b> | <b>Impact</b>     |
|-----------------------------------------------------|---------------------|----------------|-------------------|
| Aminoacyl-tRNA biosynthesis                         | 6/48                | 1.50E-05       | 0.00              |
| Valine, leucine and isoleucine biosynthesis         | 3/8                 | 9.12E-05       | 0.00              |
| Phenylalanine metabolism                            | 2/12                | 9.20E-03*      | 0.36 <sup>#</sup> |
| Arginine and proline metabolism                     | 3/38                | 1.08E-02*      | 0.17 <sup>#</sup> |
| Lysine degradation                                  | 2/25                | 3.79E-02       | 0.00              |
| Glutathione metabolism                              | 2/28                | 4.67E-02       | 0.03              |
| Phenylalanine, tyrosine and tryptophan biosynthesis | 1/4                 | 4.95E-02*      | 0.50 <sup>#</sup> |
| Synthesis and degradation of ketone bodies          | 1/5                 | 6.15E-02       | 0.00              |
| Glycine, serine and threonine metabolism            | 2/34                | 6.63E-02       | 0.02              |
| Valine, leucine and isoleucine degradation          | 2/40                | 8.82E-02       | 0.00              |
| Taurine and hypotaurine metabolism                  | 1/8                 | 9.66E-02       | 0.43              |
| Primary bile acid biosynthesis                      | 2/46                | 1.12E-01       | 0.02              |
| Arginine biosynthesis                               | 1/14                | 1.63E-01       | 0.08              |
| Butanoate metabolism                                | 1/15                | 1.74E-01       | 0.00              |
| beta-Alanine metabolism                             | 1/21                | 2.35E-01       | 0.00              |
| Glycerophospholipid metabolism                      | 1/36                | 3.70E-01       | 0.03              |
| Fatty acid degradation                              | 1/39                | 3.94E-01       | 0.00              |
| Pyrimidine metabolism                               | 1/39                | 3.94E-01       | 0.01              |
| Purine metabolism                                   | 1/66                | 5.75E-01       | 0.02              |
| Steroid hormone biosynthesis                        | 1/77                | 6.33E-01       | 0.03              |

\*p-value <0.05; and <sup>#</sup>impact > 0.1 is regarded as significant
