# Supplementary material for: Serum Metabolomic Alteration in Rats with Osteoarthritis Treated with Palm Tocotrienol-Rich Fraction Alone or in Combination with Glucosamine Sulphate
Source: MDPI journal article supplement (doi:10.3390/life13122343), 2023-12-15
Supplement: s1 [file s1]

**Table S6:** List of biochemical pathways (MetaboAnalyst) identified for **OGT vs OG**

| <b>Pathway</b>                                      | <b>Match status</b> | <b>p-value</b> | <b>Impact</b>     |
|-----------------------------------------------------|---------------------|----------------|-------------------|
| Aminoacyl-tRNA biosynthesis                         | 3/48                | 0.00           | 0.00              |
| Phenylalanine, tyrosine and tryptophan biosynthesis | 1/4                 | 0.02*          | 0.50 <sup>#</sup> |
| D-Glutamine and D-glutamate metabolism              | 1/6                 | 0.02           | 0.00              |
| Nitrogen metabolism                                 | 1/6                 | 0.02           | 0.00              |
| Ubiquinone and other terpenoid-quinone biosynthesis | 1/9                 | 0.04           | 0.00              |
| Phenylalanine metabolism                            | 1/12                | 0.05           | 0.00              |
| Arginine biosynthesis                               | 1/14                | 0.05           | 0.00              |
| Histidine metabolism                                | 1/16                | 0.06           | 0.22              |
| beta-Alanine metabolism                             | 1/21                | 0.08           | 0.00              |
| Sphingolipid metabolism                             | 1/21                | 0.08           | 0.04              |
| Glutathione metabolism                              | 1/28                | 0.11           | 0.01              |
| Alanine, aspartate and glutamate metabolism         | 1/28                | 0.11           | 0.11              |
| Glyoxylate and dicarboxylate metabolism             | 1/32                | 0.12           | 0.00              |
| Cysteine and methionine metabolism                  | 1/33                | 0.12           | 0.02              |
| Pyrimidine metabolism                               | 1/39                | 0.15           | 0.00              |
| Tyrosine metabolism                                 | 1/42                | 0.16           | 0.14              |
| Purine metabolism                                   | 1/66                | 0.24           | 0.00              |

\*p-value <0.05; and <sup>#</sup>impact > 0.1 is regarded as significant
