# Supplementary material for: Serum Metabolomic Alteration in Rats with Osteoarthritis Treated with Palm Tocotrienol-Rich Fraction Alone or in Combination with Glucosamine Sulphate
Source: MDPI journal article supplement (doi:10.3390/life13122343), 2023-12-15
Supplement: s1 [file s1]

| <b>pTable S7: List of biochemical pathways (MetaboAnalyst) identified for OGT vs OT</b> |                     |                |                   |
|-----------------------------------------------------------------------------------------|---------------------|----------------|-------------------|
| <b>Pathway</b>                                                                          | <b>Match status</b> | <b>p-value</b> | <b>Impact</b>     |
| Lysine degradation                                                                      | 2/25                | 0.00           | 0.00              |
| Phenylalanine, tyrosine and tryptophan biosynthesis                                     | 1/4                 | 0.02*          | 0.50 <sup>#</sup> |
| Synthesis and degradation of ketone bodies                                              | 1/5                 | 0.02           | 0.00              |
| Ubiquinone and other terpenoid-quinone biosynthesis                                     | 1/9                 | 0.04           | 0.00              |
| Phenylalanine metabolism                                                                | 1/12                | 0.05           | 0.00              |
| Butanoate metabolism                                                                    | 1/15                | 0.06           | 0.00              |
| Cysteine and methionine metabolism                                                      | 1/33                | 0.12           | 0.02              |
| Glycine, serine and threonine metabolism                                                | 1/34                | 0.13           | 0.00              |
| Arginine and proline metabolism                                                         | 1/38                | 0.14           | 0.01              |
| Tyrosine metabolism                                                                     | 1/42                | 0.16           | 0.14              |
| Aminoacyl-tRNA biosynthesis                                                             | 1/48                | 0.18           | 0.00              |

\*p-value <0.05; and <sup>#</sup>impact > 0.1 is regarded as significant
