# Supplementary material for: Serum Metabolomic Alteration in Rats with Osteoarthritis Treated with Palm Tocotrienol-Rich Fraction Alone or in Combination with Glucosamine Sulphate
Source: MDPI journal article supplement (doi:10.3390/life13122343), 2023-12-15
Supplement: s1 [file s1]

| <b>Table S2:</b> List of biochemical pathways (MetaboAnalyst) identified for <b>OG vs OC</b> |                     |                |                   |
|----------------------------------------------------------------------------------------------|---------------------|----------------|-------------------|
| <b>Pathway</b>                                                                               | <b>Match status</b> | <b>p-value</b> | <b>Impact</b>     |
| Aminoacyl-tRNA biosynthesis                                                                  | 5/48                | 6.24E-05       | 0.00              |
| Sphingolipid metabolism                                                                      | 2/21                | 1.74E-02       | 0.07              |
| Glutathione metabolism                                                                       | 2/28                | 3.00E-02       | 0.03              |
| Phenylalanine, tyrosine and tryptophan biosynthesis                                          | 1/4                 | 3.92E-02*      | 0.50 <sup>#</sup> |
| Synthesis and degradation of ketone bodies                                                   | 1/5                 | 4.88E-02       | 0.00              |
| Arginine and proline metabolism                                                              | 2/38                | 5.28E-02       | 0.11              |
| D-Glutamine and D-glutamate metabolism                                                       | 1/6                 | 5.83E-02       | 0.00              |
| Nitrogen metabolism                                                                          | 1/6                 | 5.83E-02       | 0.00              |
| Tryptophan metabolism                                                                        | 2/41                | 6.05E-02       | 0.24              |
| Ubiquinone and other terpenoid-quinone biosynthesis                                          | 1/9                 | 8.62E-02       | 0.00              |
| Phenylalanine metabolism                                                                     | 1/12                | 1.13E-01       | 0.00              |
| Arginine biosynthesis                                                                        | 1/14                | 1.31E-01       | 0.00              |
| Butanoate metabolism                                                                         | 1/15                | 1.40E-01       | 0.00              |
| beta-Alanine metabolism                                                                      | 1/21                | 1.90E-01       | 0.00              |
| Lysine degradation                                                                           | 1/25                | 2.23E-01       | 0.00              |
| Alanine, aspartate and glutamate metabolism                                                  | 1/28                | 2.46E-01       | 0.11              |
| Glyoxylate and dicarboxylate metabolism                                                      | 1/32                | 2.76E-01       | 0.00              |
| Cysteine and methionine metabolism                                                           | 1/33                | 2.83E-01       | 0.10              |
| Glycerophospholipid metabolism                                                               | 1/36                | 3.05E-01       | 0.00              |
| Fatty acid degradation                                                                       | 1/39                | 3.26E-01       | 0.00              |
| Pyrimidine metabolism                                                                        | 1/39                | 3.26E-01       | 0.00              |
| Tyrosine metabolism                                                                          | 1/42                | 3.47E-01       | 0.14              |
| Primary bile acid biosynthesis                                                               | 1/46                | 3.73E-01       | 0.02              |
| Purine metabolism                                                                            | 1/66                | 4.90E-01       | 0.00              |

\*p-value <0.05; and <sup>#</sup>impact > 0.1 is regarded as significant
