# Supplementary material for: Serum Metabolomic Alteration in Rats with Osteoarthritis Treated with Palm Tocotrienol-Rich Fraction Alone or in Combination with Glucosamine Sulphate
Source: MDPI journal article supplement (doi:10.3390/life13122343), 2023-12-15
Supplement: s1 [file s1]

**Table S5:** List of biochemical pathways (MetaboAnalyst) identified for **OT vs OG**

| <b>Pathway</b>                              | <b>Match status</b> | <b>p-value</b> | <b>Impact</b> |
|---------------------------------------------|---------------------|----------------|---------------|
| Lysine degradation                          | 2/25                | 0.00           | 0.00          |
| D-Glutamine and D-glutamate metabolism      | 1/6                 | 0.02           | 0.00          |
| Nitrogen metabolism                         | 1/6                 | 0.02           | 0.00          |
| Arginine biosynthesis                       | 1/14                | 0.05           | 0.00          |
| Sphingolipid metabolism                     | 1/21                | 0.08           | 0.02          |
| Glutathione metabolism                      | 1/28                | 0.11           | 0.01          |
| Alanine, aspartate and glutamate metabolism | 1/28                | 0.11           | 0.11          |
| Glyoxylate and dicarboxylate metabolism     | 1/32                | 0.12           | 0.00          |
| Glycine, serine and threonine metabolism    | 1/34                | 0.13           | 0.00          |
| Arginine and proline metabolism             | 1/38                | 0.14           | 0.01          |
| Pyrimidine metabolism                       | 1/39                | 0.15           | 0.00          |
| Aminoacyl-tRNA biosynthesis                 | 1/48                | 0.18           | 0.00          |
| Purine metabolism                           | 1/66                | 0.24           | 0.00          |
