# Supplementary material for: Serum Metabolomic Alteration in Rats with Osteoarthritis Treated with Palm Tocotrienol-Rich Fraction Alone or in Combination with Glucosamine Sulphate
Source: MDPI journal article supplement (doi:10.3390/life13122343), 2023-12-15
Supplement: s1 [file s1]

**Table S3:** List of biochemical pathways (MetaboAnalyst) identified for **OT vs OC**

| <b>Pathway</b>                             | <b>Match status</b> | <b>p-value</b>    | <b>Impact</b>     |
|--------------------------------------------|---------------------|-------------------|-------------------|
| Arginine and proline metabolism            | 3/38                | 0.00 <sup>*</sup> | 0.12 <sup>#</sup> |
| Glutathione metabolism                     | 2/28                | 0.01              | 0.03              |
| Synthesis and degradation of ketone bodies | 1/5                 | 0.03              | 0.00              |
| Aminoacyl-tRNA biosynthesis                | 2/48                | 0.03              | 0.00              |
| Butanoate metabolism                       | 1/15                | 0.09              | 0.00              |
| beta-Alanine metabolism                    | 1/21                | 0.12              | 0.00              |
| Sphingolipid metabolism                    | 1/21                | 0.12              | 0.04              |
| Lysine degradation                         | 1/25                | 0.14              | 0.00              |
| Glycine, serine and threonine metabolism   | 1/34                | 0.19              | 0.00              |
| Tryptophan metabolism                      | 1/41                | 0.22              | 0.14              |
| Purine metabolism                          | 1/66                | 0.33              | 0.02              |

\*p-value <0.05; and <sup>#</sup>impact > 0.1 is regarded as significant
