# Supplementary material for: Serum Metabolomic Alteration in Rats with Osteoarthritis Treated with Palm Tocotrienol-Rich Fraction Alone or in Combination with Glucosamine Sulphate
Source: MDPI journal article supplement (doi:10.3390/life13122343), 2023-12-15
Supplement: s1 [file s1]

**Table S4:** List of biochemical pathways (MetaboAnalyst) identified for **OGT vs OC**

| <b>Pathway</b>                                      | <b>Match status</b> | <b>p-value</b> | <b>Impact</b>     |
|-----------------------------------------------------|---------------------|----------------|-------------------|
| Phenylalanine, tyrosine and tryptophan biosynthesis | 2/4                 | 0.00*          | 1.00 <sup>#</sup> |
| Aminoacyl-tRNA biosynthesis                         | 4/48                | 0.00           | 0.00              |
| Phenylalanine metabolism                            | 2/12                | 0.00*          | 0.36 <sup>#</sup> |
| Tryptophan metabolism                               | 2/41                | 0.04*          | 0.24 <sup>#</sup> |
| Ubiquinone and other terpenoid-quinone biosynthesis | 1/9                 | 0.07           | 0.00              |
| Pantothenate and CoA biosynthesis                   | 1/19                | 0.14           | 0.01              |
| Sphingolipid metabolism                             | 1/21                | 0.16           | 0.00              |
| Lysine degradation                                  | 1/25                | 0.18           | 0.00              |
| Glutathione metabolism                              | 1/28                | 0.20           | 0.03              |
| Cysteine and methionine metabolism                  | 1/33                | 0.23           | 0.02              |
| Glycerophospholipid metabolism                      | 1/36                | 0.25           | 0.00              |
| Arginine and proline metabolism                     | 1/38                | 0.26           | 0.08              |
| Fatty acid degradation                              | 1/39                | 0.27           | 0.00              |
| Tyrosine metabolism                                 | 1/42                | 0.29           | 0.14              |

\*p-value <0.05; and <sup>#</sup>impact > 0.1 is regarded as significant.
